# Supplementary material
Source: publisher figshare collection journal article supplement (https://geolsoc.figshare.com/ndownloader/files/25726970)
Supplement: Supplementary file 1 [file 25726970]

Sample	Lithology	Co-ordinates	Symbol	Colour	SiO2	TiO2	Al2O3	FeOt	MnO	MgO	CaO	Na2O	K2O	P2O5	LOI	Total	V	Cr	Ni	Ga	Rb	Y	Zr	Nb	Hf	Pb	Th	U	Sr	Sc	Ba	La	Ce	Pr	Nd	Sm	Eu	Gd	Tb	Dy	Ho	Er	Tm	Yb	Lu	87Sr/86Sr	s.87Sr/86Sr	143Nd/144Nd	s.143Nd/144Nd
C1/18	Retrogressed eclogite	50°10'9.23"N; 17° 0'0.06"E	1	1	45.408	1.980	15.102	11.272	0.245	10.340	8.468	2.360	0.570	0.214	2.819000006	98.778	294.04	105.57	54.32	19.52	15.19	19.37	118.14	7.61	3.20	3.48	0.88	0.39	374.42	30.67	133.17	12.48	28.67	3.92	16.40	4.22	1.55	4.07	0.65	3.76	0.74	2.03	0.25	1.65	0.25	0.704789	0.000009	0.512785	0.000009
C2/18	Retrogressed eclogite	50°12'0.12"N; 17° 1'52.88"E	2	1	46.916	1.790	14.458	11.504	0.276	9.819	9.113	2.490	0.560	0.218	1.677000046	98.821	320.86	240.46	57.08	18.63	8.57	41.81	171.51	3.96	4.48	2.22	0.72	0.28	172.55	38.06	142.33	9.29	24.72	3.85	17.29	5.36	1.73	6.24	1.13	7.43	1.56	4.49	0.62	4.11	0.62	0.705368	0.000010	0.512894	0.000008
C3/18	Amphibolite	50°11'40.44"N; 17° 1'12.04"E	1	2	48.148	1.240	14.656	8.941	0.216	10.658	9.786	2.240	1.240	0.071	2.384000063	99.580	259.15	254.93	24.05	14.98	40.79	25.36	76.75	1.16	2.21	3.07	0.95	0.50	131.88	41.54	101.69	4.59	11.51	1.83	8.65	2.79	0.93	3.64	0.67	4.43	0.93	2.75	0.35	2.55	0.36	0.719553	0.000008	0.512831	0.000006
C4/18	Retrogressed eclogite	50°13'31.39"N; 17° 3'47.48"E	3	1	49.398	1.670	14.075	9.722	0.223	8.821	8.580	2.870	0.760	0.140	2.690000057	98.949	296.61	192.12	44.59	16.59	25.72	29.98	129.12	5.01	3.79	6.22	0.92	0.23	213.22	39.61	128.79	7.54	20.17	2.73	12.27	3.84	1.29	4.57	0.81	5.34	1.11	3.19	0.43	2.89	0.41	0.712843	0.000007	0.512849	0.000007
C5/18	Retrogressed eclogite	50°13'57.58"N; 17° 4'31.02"E	4	1	47.387	2.180	14.846	11.557	0.203	7.098	6.099	2.910	0.860	0.285	4.599999905	98.025	232.34	71.46	59.51	23.77	30.78	31.58	244.85	20.12	6.18	5.14	2.42	0.88	367.01	25.31	412.85	24.16	54.94	7.20	28.38	6.61	1.92	6.46	1.05	6.16	1.18	3.31	0.44	2.88	0.41	0.707716	0.000009	0.512691	0.000007
C7/18	Orthogneiss	50°15'28.73"N; 17° 4'16.62"E	1	3	66.361	0.670	14.765	4.677	0.106	2.120	0.670	2.940	3.080	0.170	2.744999886	98.304	63.52	148.24	26.38	24.65	100.71	14.55	247.77	10.65	6.45	15.55	7.87	1.50	275.21	16.28	802.56	47.17	112.58	12.32	41.08	6.99	0.94	4.91	0.67	3.40	0.59	1.45	0.18	1.21	0.17
C8/18	Retrogressed eclogite	50°15'28.73"N; 17° 4'16.62"E	5	1	48.954	1.260	14.363	10.705	0.308	9.236	9.337	2.460	0.550	0.115	1.582999945	98.871	310.63	326.52	67.01	16.95	12.79	29.54	155.04	1.07	5.74	3.18	0.54	0.19	198.43	47.49	70.17	4.97	12.74	2.12	10.28	3.48	1.35	4.32	0.79	5.21	1.11	3.14	0.44	2.87	0.41	0.709161	0.000008	0.512925	0.000007
[truncated: 6 more columns]
